# Supplementary material for: Chromosomal distribution of pTa-535, pTa-86, pTa-713, 35S rDNA repetitive sequences in interspecific hexaploid hybrids of common wheat (Triticum aestivum L.) and spelt (Triticum spelta L.)
Source: PubMed Central journal article supplement (PMC5813972; doi:10.1371/journal.pone.0192862), 2018-02-15
Supplement: pone.0192862.s002.pdf [file pone.0192862.s002.pdf]

Table 2. Primers sequences and PCR conditions for wheat repetitive sequences amplification

| Clone                              | NCBI GenBank accession number | Website address                                                                                               | Primer sequence (5'→3')                       | Annealing temperature (°C) | Product length (bp) |
|------------------------------------|-------------------------------|---------------------------------------------------------------------------------------------------------------|-----------------------------------------------|----------------------------|---------------------|
| <b>pTa-535</b>                     | KC290894.1                    | <a href="https://www.ncbi.nlm.nih.gov/nuccore/KC290894.1">https://www.ncbi.nlm.nih.gov/nuccore/KC290894.1</a> | GCATAGCATGTGCGAAAGAG<br>TCGTCCGAAACCCTGATAC   | 58                         | 101                 |
| <b>pTa-86</b>                      | KC290896.1                    | <a href="https://www.ncbi.nlm.nih.gov/nuccore/KC290896.1">https://www.ncbi.nlm.nih.gov/nuccore/KC290896.1</a> | ACGATTGACCAATCTCGGGG<br>ACCGACCCAAATTACGAGAGT | 58.5                       | 531                 |
| <b>pTa-713</b>                     | KC290900.1                    | <a href="https://www.ncbi.nlm.nih.gov/nuccore/KC290900.1">https://www.ncbi.nlm.nih.gov/nuccore/KC290900.1</a> | GGGGCGGACGTCGTTG<br>CCGTAAGATAGACAGGGTGGG     | 59                         | 337                 |
| <b>pTa-k374<br/>(35S<br/>rDNA)</b> | KC290907                      | <a href="https://www.ncbi.nlm.nih.gov/nuccore/KC290907">https://www.ncbi.nlm.nih.gov/nuccore/KC290907</a>     | TTTCAACCAAGCGCGATGAC<br>ATCAGCGGGGAAAGAAGACC  | 59                         | 690                 |
