# Supplementary material for: Chromosomal distribution of pTa-535, pTa-86, pTa-713, 35S rDNA repetitive sequences in interspecific hexaploid hybrids of common wheat (Triticum aestivum L.) and spelt (Triticum spelta L.)
Source: PubMed Central journal article supplement (PMC5813972; doi:10.1371/journal.pone.0192862), 2018-02-15
Supplement: pone.0192862.s003.pdf [file pone.0192862.s003.pdf]

Table 3. The pTa-535, pTa-86, pTa-713 and 35S rDNA repetitive sequences distribution on chromosomes

| <b>Chromosome</b> | <b>Arm</b> | <b>pTa-535</b> | <b>pTa-86</b> | <b>pTa-713</b> | <b>pTa-k374 (35S rDNA)</b> |
|-------------------|------------|----------------|---------------|----------------|----------------------------|
| <b>1A</b>         | S          | T, ST, C       | -             | -              | - or T                     |
|                   | L          | ST,C           | -             | -              | -                          |
| <b>2A</b>         | S          | T, C           | -             | -              | -                          |
|                   | L          | T,C            | -             | -              | -                          |
| <b>3A</b>         | S          | C              | -             | -              | -                          |
|                   | L          | C              | -             | -              | -                          |
| <b>4A</b>         | S          | -              | -             | -              | -                          |
|                   | L          | T or ST        | T or ST       | ST             | -                          |
| <b>5A</b>         | S          | -              | T             | C              | -                          |
|                   | L          | ST             | -             | C              | -                          |
| <b>6A</b>         | S          | T              | -             | -              | -                          |
|                   | L          | -              | -             | - or T         | -                          |
| <b>7A</b>         | S          | T, ST          | -             | C              | -                          |
|                   | L          | T              | -             | C              | -                          |
| <b>1B</b>         | S          | -              | - or T        | - or T, C      | ST                         |
|                   | L          | -              | T, ST         | C              | -                          |
| <b>2B</b>         | S          | -              | T             | -              | -                          |
|                   | L          | -              | ST            | -              | -                          |
| <b>3B</b>         | S          | -              | T, ST         | -              | -                          |
|                   | L          | T, ST          | -             | -              | -                          |
| <b>4B</b>         | S          | -              | T             | C              | -                          |
|                   | L          | -              | T, ST         | C              | -                          |
| <b>5B</b>         | S          | -              | T             | C              | -                          |
|                   | L          | -              | -             | C              | -                          |
| <b>6B</b>         | S          | -              | - or T        | C              | ST                         |
|                   | L          | -              | T, ST         | C              | -                          |
| <b>7B</b>         | S          | ST             | ST            | -              | -                          |
|                   | L          | -              | ST            | -              | -                          |
| <b>1D</b>         | S          | T              | -             | -              | -                          |
|                   | L          | T              | -             | -              | -                          |
| <b>2D</b>         | S          | T, ST, C       | T             | -              | -                          |
|                   | L          | T, ST, C       | -             | -              | -                          |
| <b>3D</b>         | S          | T, ST          | -             | -              | -                          |
|                   | L          | T              | -             | -              | -                          |
| <b>4D</b>         | S          | C              | -             | -              | -                          |
|                   | L          | ST,C           | -             | -              | -                          |
| <b>5D</b>         | S          | T              | -             | -              | T                          |
|                   | L          | ST             | -             | -              | -                          |
| <b>6D</b>         | S          | T,ST           | -             | C              | -                          |
|                   | L          | T              | -             | C              | -                          |
| <b>7D</b>         | S          | T              | -             | C              | -                          |
|                   | L          | T              | -             | C              | -                          |

Abbreviations: S- short arm, L- long arm, T- telomeric region, ST- subtelomeric region, C- centromeric region, - absence of the signal
