# Supplementary material for: Chromosomal distribution of pTa-535, pTa-86, pTa-713, 35S rDNA repetitive sequences in interspecific hexaploid hybrids of common wheat (Triticum aestivum L.) and spelt (Triticum spelta L.)
Source: PLOS journal article supplement (doi:10.1371/journal.pone.0192862), 2018-02-15
Supplement: S1 (10.1371/journal.pone.0192862.s001) [file journal.pone.0192862.s001]

Table 1. Description of the accessions used in this study

| Accession no               | Hybrids                              | Origin                                                                                  |
|----------------------------|--------------------------------------|-----------------------------------------------------------------------------------------|
| 1                          | TORKA x S10                          | Line of own breeding, University of Warmia and Mazury                                   |
| 2                          | TORKA x S11                          | Line of own breeding, University of Warmia and Mazury                                   |
| 3                          | TORKA x S12                          | Line of own breeding, University of Warmia and Mazury                                   |
| 4                          | TORKA x S14                          | Line of own breeding, University of Warmia and Mazury                                   |
| 5                          | KONTESA x S10                        | Line of own breeding, University of Warmia and Mazury                                   |
| 6                          | KONTESA x S11                        | Line of own breeding, University of Warmia and Mazury                                   |
| 7                          | KONTESA x S12                        | Line of own breeding, University of Warmia and Mazury                                   |
| 8                          | KONTESA x S13                        | Line of own breeding, University of Warmia and Mazury                                   |
| 9                          | KONTESA x S14                        | Line of own breeding, University of Warmia and Mazury                                   |
| 10                         | ZEBRA x S10                          | Line of own breeding, University of Warmia and Mazury                                   |
| 11                         | ZEBRA x S11                          | Line of own breeding, University of Warmia and Mazury                                   |
| 12                         | ZEBRA x S12                          | Line of own breeding, University of Warmia and Mazury                                   |
| 13                         | ZEBRA x S13                          | Line of own breeding, University of Warmia and Mazury                                   |
| 14                         | ZEBRA x S14                          | Line of own breeding, University of Warmia and Mazury                                   |
| 15                         | S10 x TORKA                          | Line of own breeding, University of Warmia and Mazury                                   |
| 16                         | S11 x TORKA                          | Line of own breeding, University of Warmia and Mazury                                   |
| 17                         | S12 x TORKA                          | Line of own breeding, University of Warmia and Mazury                                   |
| 18                         | S13 x TORKA                          | Line of own breeding, University of Warmia and Mazury                                   |
| 19                         | S14 x TORKA                          | Line of own breeding, University of Warmia and Mazury                                   |
| 20                         | S10 x KONTESA                        | Line of own breeding, University of Warmia and Mazury                                   |
| 21                         | S11 x KONTESA                        | Line of own breeding, University of Warmia and Mazury                                   |
| 22                         | S12 x KONTESA                        | Line of own breeding, University of Warmia and Mazury                                   |
| 23                         | S13 x KONTESA                        | Line of own breeding, University of Warmia and Mazury                                   |
| 24                         | S14 x KONTESA                        | Line of own breeding, University of Warmia and Mazury                                   |
| <b>Parental components</b> |                                      |                                                                                         |
| 25                         | <i>Triticum aestivum</i> cv. Torka   | Material obtained from seed company (own reproduction), University of Warmia and Mazury |
| 26                         | <i>Triticum aestivum</i> cv. Kontesa | Material obtained from seed company (own reproduction), University of Warmia and Mazury |
| 27                         | <i>Triticum aestivum</i> cv. Zebra   | Material obtained from seed company (own reproduction), University of Warmia and Mazury |
| 28                         | S10                                  | Spelt line of own breeding, University of Warmia and Mazury                             |
| 29                         | S11                                  | Spelt line of own breeding, University of Warmia and Mazury                             |
| 30                         | S12                                  | Spelt line of own breeding, University of Warmia and Mazury                             |
| 31                         | S13                                  | Spelt line of own breeding, University of Warmia and Mazury                             |
| 32                         | S14                                  | Spelt line of own breeding, University of Warmia and Mazury                             |
